# Supplementary material for: A large de novo 9p21.3 deletion in a girl affected by astrocytoma and multiple melanoma
Source: PubMed Central journal article supplement (PMC4036080; doi:10.1186/1471-2350-15-59), 2014-05-17
Supplement: 1471-2350-15-59-S1.pdf [file 1471-2350-15-59-S1.pdf]

## **Supplemental Methods**

**Sequencing.** Genomic DNA was extracted from peripheral blood using standard procedures and its quality was monitored using a Nanodrop spectrophotometer. DNA was amplified for CDKN2A, CDK4, MC1R, TP53 and MITF as described previously [13, S1]. PCR products were subjected to automatic sequencing by ABI PRISM 310 genetic analyzer (Applied Biosystems).

**Microsatellite analysis.** The primers used for microsatellite typing are reported in Table S1. In each primer pair, a 5'-FAM oligonucleotide was used. Amplification products were visualized as described for Sequencing. Analysis was conducted using Peak Scanner Software v1.0 using GeneScan-400 TAMRA size standard (Applied Biosystems).

**Multiplex ligation-dependent probe amplification (MLPA).** MLPA kits ME024-B1-salsa and P024-B2-salsa were used to profile the 9p21 region as detailed by the manufacturer instructions (MRC-Holland, Amsterdam, the Netherlands). Probe amplification products were run on an ABI PRISM 310 genetic analyzer using GeneScan-500 TAMRA size standard. Results were analyzed by Coffalyser v9.4 software after normalization of peaks against three samples of DNA from healthy donors.

**Array-CGH.** The array-CGH analysis was performed using the SurePrint G3 Human CGH Agilent 2x400K array as recommended by Agilent (protocol Version 7.2 July 2012 Agilent Technologies). A graphical visualization of the results was provided by the Agilent CytoGenomics (v 2.7.22.0) with the following parameters: aberration algorithm ADM-2, threshold 6.0 and moving average window 1Mb. Aberrant signals including 3 or more consecutive probes with the same polarity were called as deletion or duplication. Physical

mapping and gene location were obtained from the UCSC Genome Browser (hg19, NCBI Build 37).

### Supplemental References

- S1. Pollio A, Tomasi A, Seidenari S, Pellacani G, Rodolfo M, Frigerio S, Maurichi A, Turchetti D, Bassoli S, Ruini C, Ponti G. **Malignant and benign tumors associated with multiple primary melanomas: just the starting block for the involvement of MITF, PTEN and CDKN2A in multiple cancerogenesis?** *Pigment Cell Melanoma Res* 2013, **26**:755-757.
- S2. Presti JC Jr, Wilhelm M, Reuter V, Russo P, Motzer R, Waldman F. **Allelic loss on chromosomes 8 and 9 correlates with clinical outcome in locally advanced clear cell carcinoma of the kidney.** *J Urol* 2002, **167**:1464-1468.
- S3. Grady B, Goharderakhshan R, Chang J, Ribeiro-Filho LA, Perinchery G, Franks J, Presti J, Carroll P, Dahiya R. **Frequently deleted loci on chromosome 9 may harbor several tumor suppressor genes in human renal cell carcinoma.** *J Urol* 2001, **166**:1088-1092.
- S4. Smeds J, Kumar R, Rozell BL, Hemminki K. **Increased frequency of LOH on chromosome 9 in sporadic primary melanomas is associated with increased patient age at diagnosis.** *Mutagenesis* 2000, **15**:257-260.
- S5. Pollock PM, Spurr N, Bishop T, Newton-Bishop J, Gruis N, van der Velden PA, Goldstein AM, Tucker MA, Foulkes WD, Barnhill R, Haber D, Fountain J, Hayward NK. **Haplotype analysis of two recurrent CDKN2A mutations in 10 melanoma families: evidence for common founders and independent mutations.** *Human Mutation* 1998, **11**:424-431.

S6. Mistry SH, Taylor C, Randerson-Moor JA, Harland M, Turner F, Barrett JH, Whitaker L, Jenkins RB, Knowles MA, Bishop JA, Bishop DT. **Prevalence of 9p21 deletions in UK melanoma families.** *Genes Chromosomes Cancer* 2005,**44**:292-300.
