# Supplementary material for: A large de novo 9p21.3 deletion in a girl affected by astrocytoma and multiple melanoma
Source: PubMed Central journal article supplement (PMC4036080; doi:10.1186/1471-2350-15-59), 2014-05-17
Supplement: 1471-2350-15-59-S2.pdf [file 1471-2350-15-59-S2.pdf]

**Table S1. Primers of the microsatellite markers used in the study.** Start and end positions are reported according to UCSC Genome Browser (hg19, NCBI Build 37).

| microsatellite | FORWARD PRIMER            | REVERSE PRIMER           | start    | end      | ref |
|----------------|---------------------------|--------------------------|----------|----------|-----|
| D9S921         | GGTAAGTCAGCTATAATGATC     | CTCTTTCATGTTGGCTCCTGT    | 10509506 | 10509623 | S2  |
| D9S1839        | CTTGTTTATCTCAAGGAAATACGTG | CCATAGTCAGTGTGCGCT       | 16418749 | 16419098 | S3  |
| D9S157         | AGCAAGGCAAGCCACATTC       | TGGGGATGCCAGATAACTATATC  | 17628219 | 17628591 | S3  |
| D9S162         | GCAATGACCAGTTAAGGTTTC     | AATCCCACAACAAATCTCC      | 19679803 | 19680020 | S3  |
| D9S736         | TTCTAGACCTCTCAGCAGAC      | GATAGTGTGGAGACACCAG      | 21636294 | 21636463 | S4  |
| D9S974         | GAGCCTGGTCTGGATCATAA      | AAGCCTACAGAACCAGACAG     | 21987353 | 21987560 | S5  |
| D9S942         | GCAAGATTCCAACAGTA         | CTCATCCTGCGGAAACCATT     | 21990577 | 21990675 | S5  |
| D9S1748        | CACCTCAGAAGTCAGTGAGT      | GTGCTTGAAATACACCTTTCC    | 21993775 | 21993894 | S5  |
| D9S171         | AGCTAAGTGAACCTCATCTCTGTCT | ACCCTAGCACTGATGGTATAGTCT | 24534209 | 24534427 | S6  |
