# Supplementary material for: A large de novo 9p21.3 deletion in a girl affected by astrocytoma and multiple melanoma
Source: PubMed Central journal article supplement (PMC4036080; doi:10.1186/1471-2350-15-59), 2014-05-17
Supplement: 1471-2350-15-59-S5.pdf [file 1471-2350-15-59-S5.pdf]

**Table S2. List of chromosomal aberrations detected by aCGH (400K) in patient B not reported in the Database of Genomic Variants (<http://dgv.tcag.ca/dgv/app/home?ref=GRCh37/hg19>).** CNVs in non coding regions were detected on 7p12.3, 7q11.22, 19q13.11 chromosomal regions. A large region on 14q11.2 contains genes poorly characterized functionally. CNVs on 4p14 and 16q24.3 involve genes of potential interest since they have been involved in the regulation of cell growth and death.

| Chromosomal Region | Start    | End      | Probes | Size (Kb) | Type | Gene Content                                          | Gene Function                                                                                                                                                                                                                                                                                               |
|--------------------|----------|----------|--------|-----------|------|-------------------------------------------------------|-------------------------------------------------------------------------------------------------------------------------------------------------------------------------------------------------------------------------------------------------------------------------------------------------------------|
| 4p14               | 38678882 | 38710915 | 8      | 32,03     | DUP  | <i>KLF3</i>                                           | <i>Kruppel-Like Factor 3</i> : belong to Sp/KLF family of transcription factors. It has a characteristic zinc finger domain, but lack the N-terminal buttonhead box found in related SP transcription factors.                                                                                              |
| 7p12.3             | 46700759 | 46723906 | 3      | 23,14     | DUP  |                                                       |                                                                                                                                                                                                                                                                                                             |
| 7q11.22            | 70332231 | 70356011 | 3      | 23,78     | DUP  |                                                       |                                                                                                                                                                                                                                                                                                             |
| 14q11.2            | 19376762 | 20420790 | 35     | 1044      | DUP  | <i>AK022914</i>                                       | No protein                                                                                                                                                                                                                                                                                                  |
|                    |          |          |        |           |      | <i>LINC00516</i>                                      | No protein                                                                                                                                                                                                                                                                                                  |
|                    |          |          |        |           |      | <i>BC017398</i>                                       | No protein                                                                                                                                                                                                                                                                                                  |
|                    |          |          |        |           |      | <i>P775P</i>                                          | No protein                                                                                                                                                                                                                                                                                                  |
|                    |          |          |        |           |      | <i>DQ573684</i>                                       | No protein                                                                                                                                                                                                                                                                                                  |
|                    |          |          |        |           |      | <i>DQ595048</i>                                       | No protein                                                                                                                                                                                                                                                                                                  |
|                    |          |          |        |           |      | <i>DQ573684</i>                                       | No protein                                                                                                                                                                                                                                                                                                  |
|                    |          |          |        |           |      | <i>DQ582484</i>                                       | No protein                                                                                                                                                                                                                                                                                                  |
|                    |          |          |        |           |      | <i>POTEM</i>                                          | <i>POTE ankyrin domain family, member M</i>                                                                                                                                                                                                                                                                 |
|                    |          |          |        |           |      | <i>P712P</i>                                          | No protein                                                                                                                                                                                                                                                                                                  |
|                    |          |          |        |           |      | <i>OR11H, OR4Q3, OR4M, OR4N2, OR4K2, OR4K5, OR4K1</i> | <i>Olfactory receptors</i> proteins that interact with odorant molecules in the nose, to initiate a neuronal response that triggers the perception of a smell. OR are members of a large family of G receptors (GPCR) arising from single coding-exon genes. The family is the largest in the human genome. |
| 16q24.3            | 89956932 | 89981670 | 5      | 24,74     | DUP  | <i>TCF25</i>                                          | <i>Transcription factor 25 (basic helix-loop-helix)</i> is a member of the basic helix-loop-helix (bHLH) family of transcription factors that are important in embryonic development.                                                                                                                       |
| 19q13.11           | 35852152 | 35861485 | 3      | 9,334     | DUP  |                                                       |                                                                                                                                                                                                                                                                                                             |
