# Supplementary material for: A large de novo 9p21.3 deletion in a girl affected by astrocytoma and multiple melanoma
Source: PubMed Central journal article supplement (PMC4036080; doi:10.1186/1471-2350-15-59), 2014-05-17

**Figure S3. Results of array-CGH of the 9p21.3 region in patient A and her twin sister.** aCGH analysis showed an identical 9p21.3 deletion of ~ 2,135Mb.

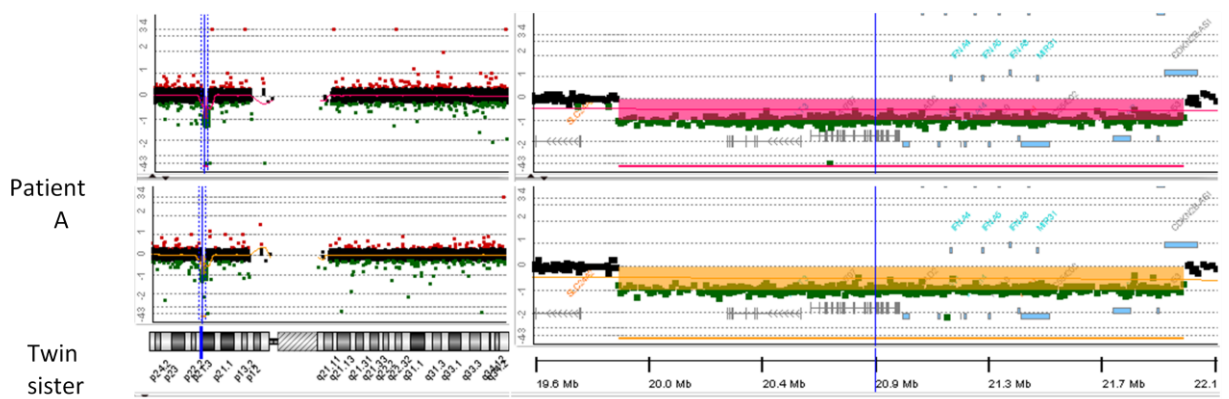

Supplement: 1471-2350-15-59-S6.pdf [file 1471-2350-15-59-S6.pdf]
